# Supplementary material for: Primary outcome measures used in interventional trials for ankle fractures: a systematic review
Source: Springer Nature journal article supplement (doi:10.1186/s12891-019-2770-2), 2019-08-28
Supplement: MOESM2 [file 17111740]

## Appendix 2 - Search Strategy

Search initially completed on 02/11/2018

Updated for publication following peer-review on 19/06/2019

Table 1- Search Strategy - Medline

| Number | Term                                                           | Returns |
|--------|----------------------------------------------------------------|---------|
| 1      | exp ANKLE/                                                     | 8510    |
| 2      | exp Ankle Joint/                                               | 13849   |
| 3      | exp Ankle Injuries/                                            | 8941    |
| 4      | exp Fractures, Bone/                                           | 167059  |
| 5      | fracture*.mp.                                                  | 242117  |
| 6      | 1 or 2 or 3                                                    | 26960   |
| 7      | 4 or 5                                                         | 244160  |
| 8      | 6 and 7                                                        | 5848    |
| 9      | exp TIBIA/                                                     | 31611   |
| 10     | exp Tibial Fractures/                                          | 14058   |
| 11     | exp FIBULA/                                                    | 8068    |
| 12     | 7 and 11                                                       | 3434    |
| 13     | 7 and 9                                                        | 5669    |
| 14     | 8 or 10 or 12 or 13                                            | 22739   |
| 15     | exp Randomized Controlled Trial/                               | 454845  |
| 16     | exp Controlled Clinical Trial/                                 | 542188  |
| 17     | randomized.mp. or exp RANDOMIZED CONTROLLED TRIALS AS A TOPIC/ | 672656  |
| 18     | placebo.mp.                                                    | 176058  |
| 19     | randomly.mp.                                                   | 246332  |
| 20     | trial.mp.                                                      | 987780  |
| 21     | 15 or 16 or 17 or 18 or 19 or 20                               | 1303244 |
| 22     | 14 and 21                                                      | 1146    |
| 23     | limit 22 to ep=20181101-20190619                               | 12      |

|    |                                  |    |
|----|----------------------------------|----|
| 24 | limit 22 to ed=20181101-20190619 | 47 |
| 25 | 23 or 24                         | 48 |

Table 2 - Search Strategy - Embase

| Number | Term                                                                        | Returns |
|--------|-----------------------------------------------------------------------------|---------|
| 1      | exp Ankle/                                                                  | 35242   |
| 2      | exp ankle injury/                                                           | 13358   |
| 3      | exp ankle fracture/                                                         | 6436    |
| 4      | exp fracture/                                                               | 310972  |
| 5      | 1 and 4                                                                     | 3172    |
| 6      | exp distal tibia/                                                           | 825     |
| 7      | 4 and 6                                                                     | 251     |
| 8      | exp distal tibia fracture/                                                  | 899     |
| 9      | exp distal fibula/                                                          | 339     |
| 10     | 4 and 9                                                                     | 81      |
| 11     | exp distal fibula fracture/                                                 | 160     |
| 12     | 2 or 3 or 5 or 7 or 8 or 10 or 11                                           | 16316   |
| 13     | randomized controlled trial/                                                | 555998  |
| 14     | exp controlled clinical trial/                                              | 741317  |
| 15     | randomized.mp. or exp "randomized controlled trial (topic)" or exp placebo/ | 1212040 |
| 16     | randomly.mp.                                                                | 415131  |
| 17     | trial.mp. or exp "clinical trial (topic)"/                                  | 2038434 |
| 18     | 13 or 14 or 15 or 16 or 17                                                  | 2539001 |
| 19     | 12 and 18                                                                   | 1328    |
| 20     | Limit 19 to dd=20181101-20190619                                            | 26      |
| 21     | Limit 19 to dc=20181101-20190619                                            | 79      |
| 22     | 20 or 21                                                                    | 80      |

Table 3 - Search Strategy - CINAHL

| Number | Term                                                          | Returns |
|--------|---------------------------------------------------------------|---------|
| 1      | (MH "Ankle")                                                  | 4476    |
| 2      | (MH "Ankle Joint")                                            | 5164    |
| 3      | (MH "Ankle Injuries+")                                        | 5585    |
| 4      | (MH "Fractures+")                                             | 49656   |
| 5      | (MH "Tibia")                                                  | 6946    |
| 6      | (MH "Fibula")                                                 | 1342    |
| 7      | S1 OR S2 OR S3                                                | 13716   |
| 8      | S4 AND S7                                                     | 2351    |
| 9      | S5 OR S6                                                      | 7887    |
| 10     | S4 AND S9                                                     | 1228    |
| 11     | S8 OR S10                                                     | 3310    |
| 12     | (MH "Tibial Fractures+")                                      | 3190    |
| 13     | (MH "Fibula Fractures")                                       | 201     |
| 14     | S11 OR S12 OR S13                                             | 5804    |
| 15     | (MH "Randomized Controlled Trials") OR (MH "Clinical Trials") | 225490  |
| 16     | "randomly"                                                    | 73950   |
| 17     | "trial"                                                       | 183772  |
| 18     | "placebo" OR (MH "Placebos")                                  | 55280   |
| 19     | S15 OR S16 OR S17 OR S18                                      | 379014  |
| 20     | S14 AND S19                                                   | 332     |
| 21     | S14 AND 219 limiters: Published date: 20180101-20191231       | 42      |

Table 4 – Search Strategy - AMED

| Number | Term                | Returns |
|--------|---------------------|---------|
| 1      | exp Ankle/          | 1432    |
| 2      | exp ankle injuries/ | 1468    |

|    |                                        |       |
|----|----------------------------------------|-------|
| 3  | exp fractures bone/                    | 2539  |
| 4  | 1 and 3                                | 45    |
| 5  | 2 or 4                                 | 1513  |
| 6  | exp Fibula/                            | 316   |
| 7  | exp Tibia/                             | 1064  |
| 8  | 6 or 7                                 | 1277  |
| 9  | 3 and 8                                | 147   |
| 10 | 5 or 9                                 | 1613  |
| 11 | exp Randomized controlled trials/      | 2210  |
| 12 | controlled clinical trial.mp.          | 491   |
| 13 | exp Clinical trials/ or randomized.mp. | 12792 |
| 14 | randomly.mp.                           | 5994  |
| 15 | trial.mp.                              | 11004 |
| 16 | 11 or 12 or 13 or 14 or 15             | 20860 |
| 17 | 10 and 16                              | 146   |

Table 5 - Search Strategy - Cochrane CENTRAL Trials Register

| Number | Term                                                                          | Returns |
|--------|-------------------------------------------------------------------------------|---------|
| #1     | MeSH descriptor: [Ankle Joint] explode all trees                              | 663     |
| #2     | MeSH descriptor: [Ankle Injuries] explode all trees                           | 665     |
| #3     | MeSH descriptor: [Ankle] explode all trees                                    | 470     |
| #4     | MeSH descriptor: [Tibia] explode all trees                                    | 566     |
| #5     | MeSH descriptor: [Fibula] explode all trees                                   | 70      |
| #6     | MeSH descriptor: [Ankle Fractures] explode all trees                          | 121     |
| #7     | #1 or #2 or #3 or #4 or #5 or #6                                              | 2268    |
| #8     | MeSH descriptor: [Fractures, Bone] explode all trees                          | 5398    |
| #9     | #8 and #7 with Cochrane publication date from Nov 2018 to Jun 2019, in Trials | 13      |

Table 6 - Search Strategy - ISRCTN Registry

| Number | Term           | Returns |
|--------|----------------|---------|
| #1     | Ankle Fracture | 60      |

Table 7 - Search Strategy - ClinicalTrials.gov Registry

| Number | Term                                       | Returns |
|--------|--------------------------------------------|---------|
| #1     | Ankle Fracture                             | 117     |
| #2     | Limit to "Interventional (Clinical Trial)" | 94      |
